# Supplementary material for: Communicating the relative health risks of E-cigarettes: An online experimental study exploring the effects of a comparative health message versus the EU nicotine addiction warnings on smokers’ and non-smokers’ risk perceptions and behavioural intentions
Source: PubMed Central journal article supplement (PMC6891257; doi:10.1016/j.addbeh.2019.106177), 2020-02
Supplement: mmc1.pdf [file mmc1.pdf]

## **Supplementary Materials:**

***Title: Communicating the Relative Health Risks of E-Cigarettes: An online experimental study exploring the Effects of a Comparative Health Message versus the EU Nicotine Addiction Warnings on Smokers' and Non-Smokers' Risk Perceptions and Behavioural Intentions.***

### **Stimuli used in randomised conditions:**

Participants were randomised to one of the six conditions (each condition consisted of 4 EC packs). Each message was placed on a series of 4 different types of EC packs (Figure 1) and each pack was displayed in a sequential order for a standardised period of 30 seconds. Note, images presented below act as a template, parameters were later set to comply with the current EU-TPD requirements (i.e. all messages occupied 30% of the surface of the pack and placed at the bottom of the pack; these were presented in black Helvetica bold type on a white background).

### **TPD1 CONDITION**

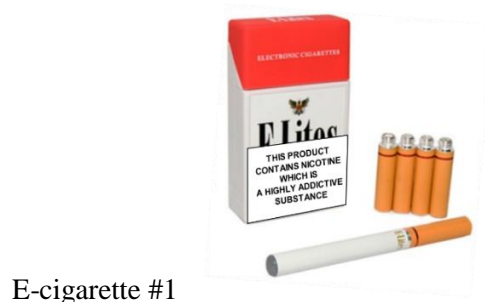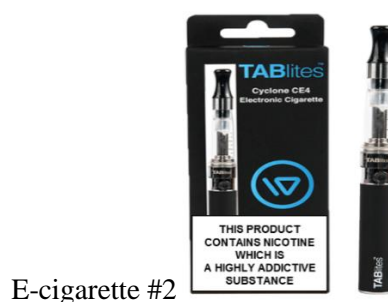

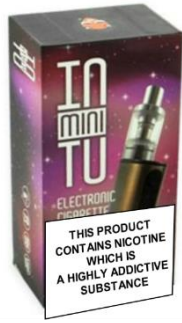

E-cigarette #3

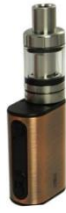

E-cigarette #4

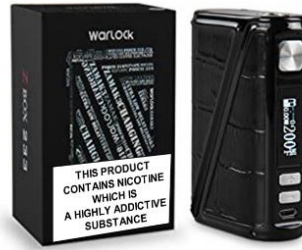

### TPD2 CONDITION

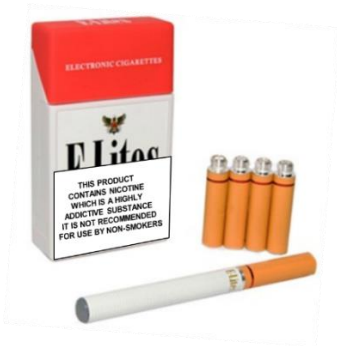

E-cigarette #1

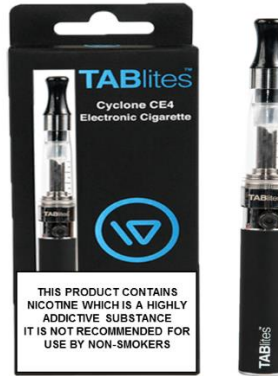

E-cigarette #2

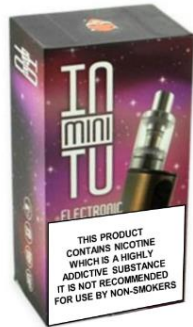

E-cigarette #3

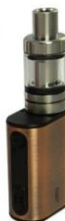

E-cigarette #4

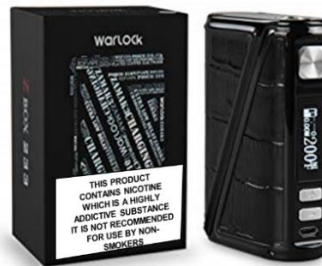

### COMP CONDITION

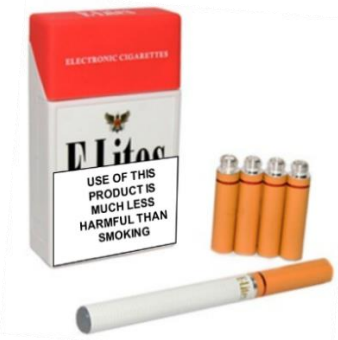

E-cigarette #1

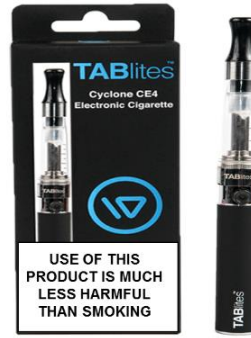

E-cigarette #2

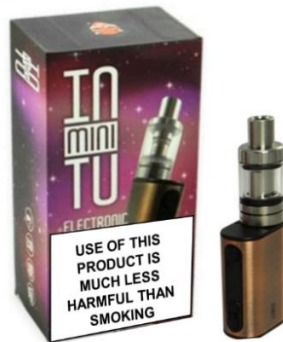

E-cigarette #3

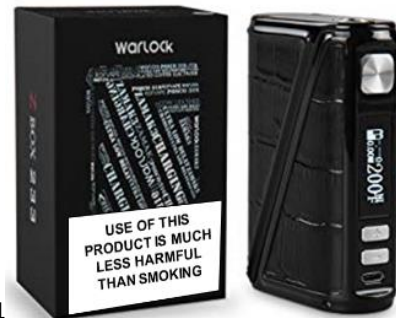

E-cigarette #4

### TPD1+COMP CONDITION

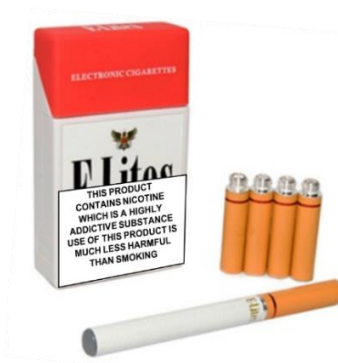

E-cigarette #1

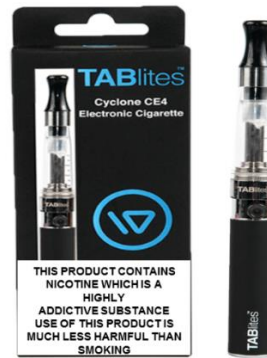

E-cigarette #2

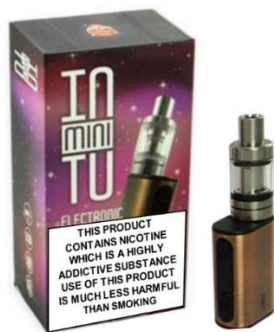

E-cigarette #3

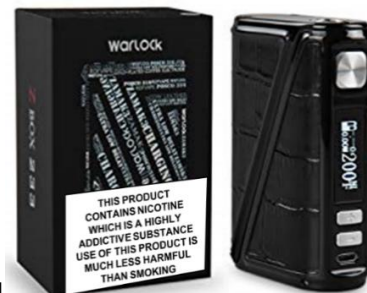

E-cigarette #4

**TPD2+COMP CONDITION**

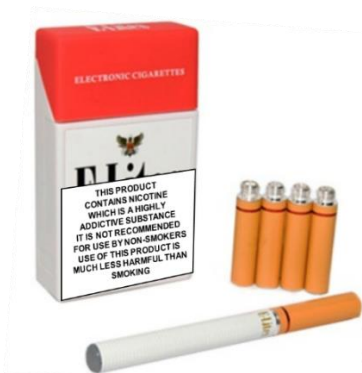

E-cigarette #1

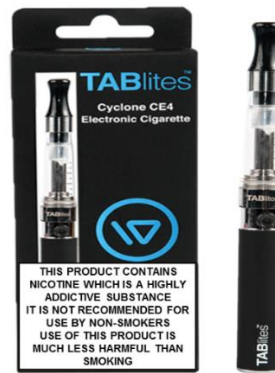

E-cigarette #2

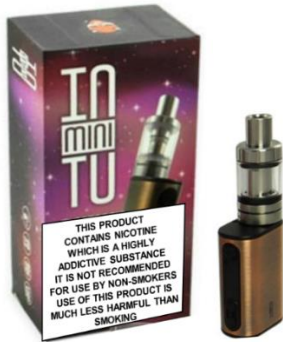

E-cigarette #3

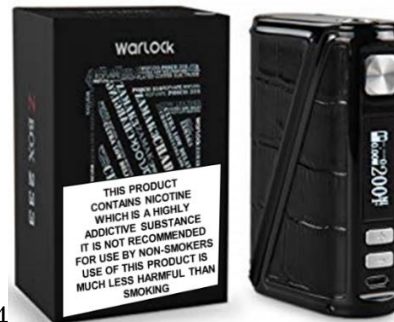

E-cigarette #4

**NO MESSAGE CONDITION**

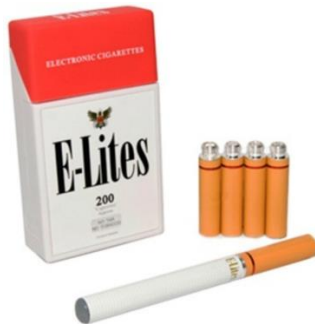

E-cigarette #1

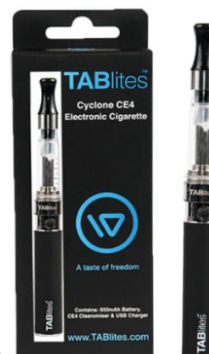

E-cigarette #2

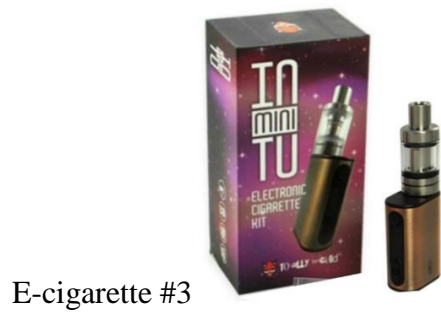

E-cigarette #3

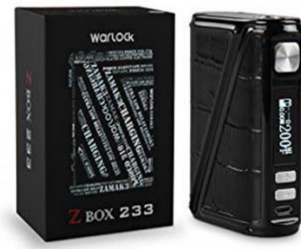

E-cigarette #4

**Figure 1. Randomisation of stimuli per condition for each message on EC packs**
